# Supplementary figures and images for: Internet-Delivered Treatment for Substance Abuse: A Multisite Randomized Controlled Trial
Source: Atypon-hosted journal article supplement (doi:10.1176/appi.ajp.2014.13081055), 2014-04-04

FIGURE S1. Study Enrollment and Patient Flow

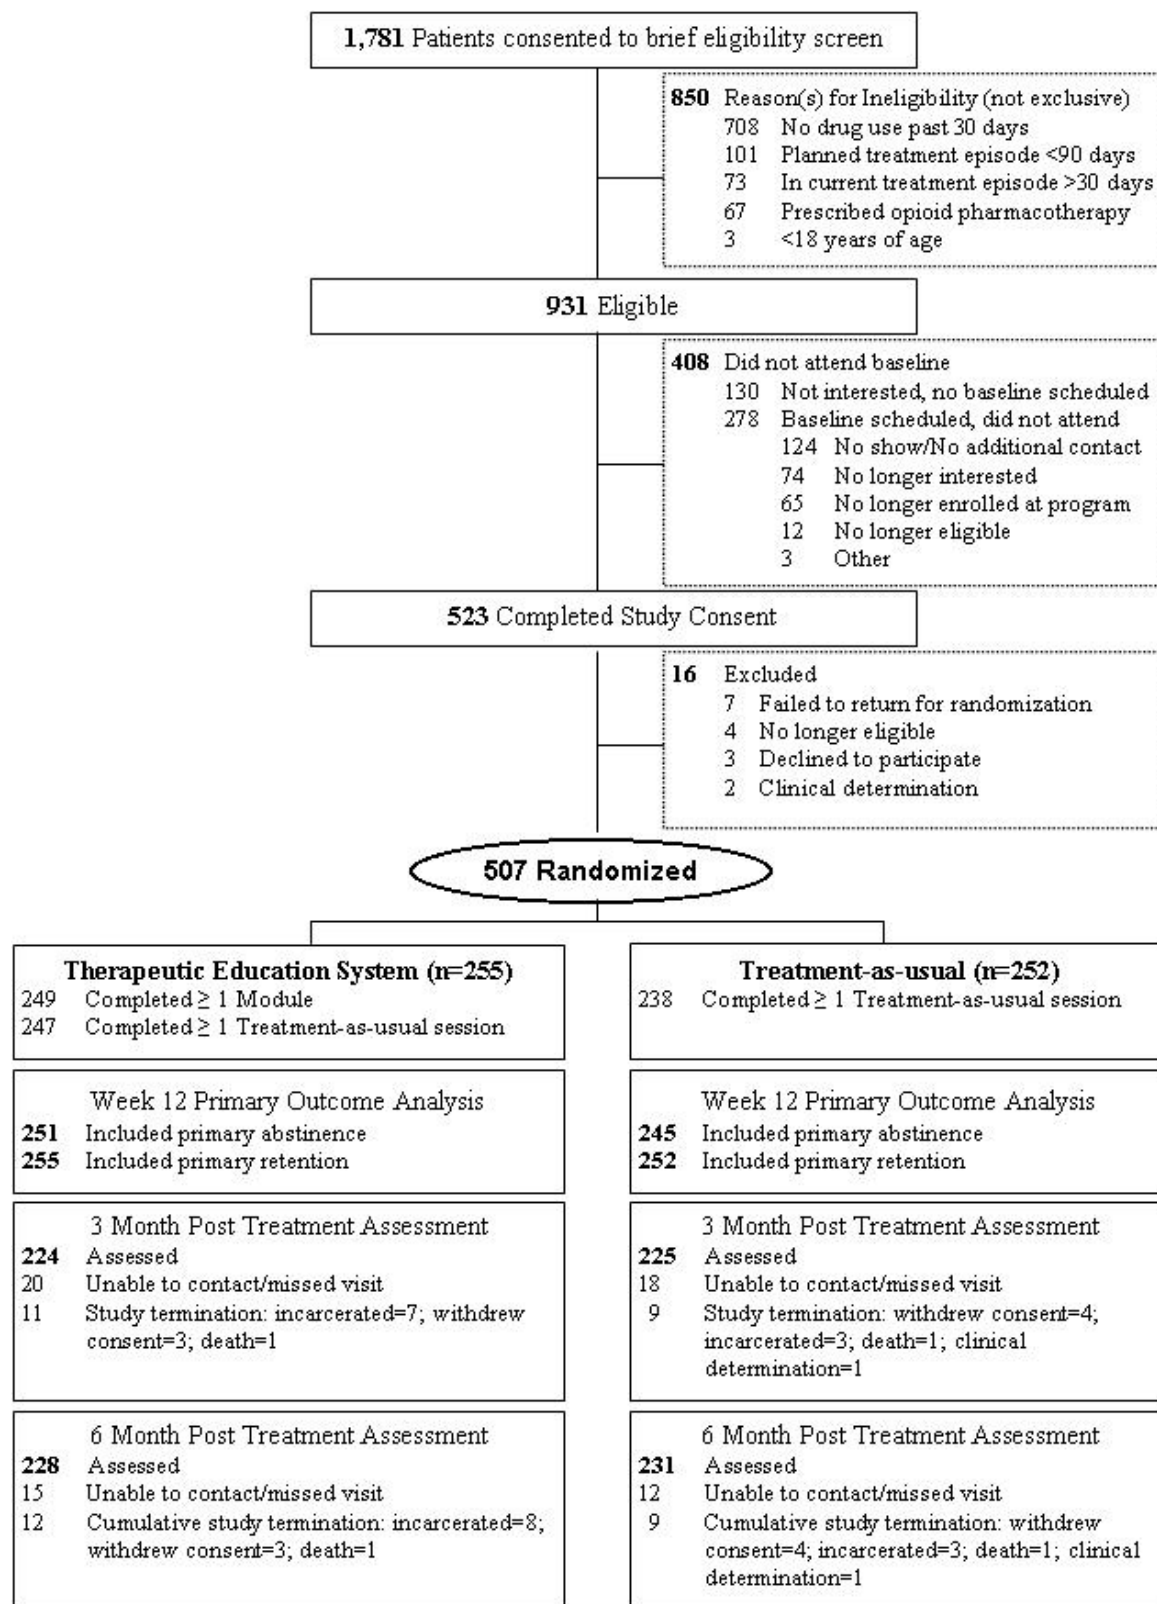

Supplement: 683_ds001.pdf [file 683_ds001.pdf]
